# Supplementary material
Source: PubMed Central journal article supplement (PMC7187825)
Supplement: mmc1.pdf [file mmc1.pdf]

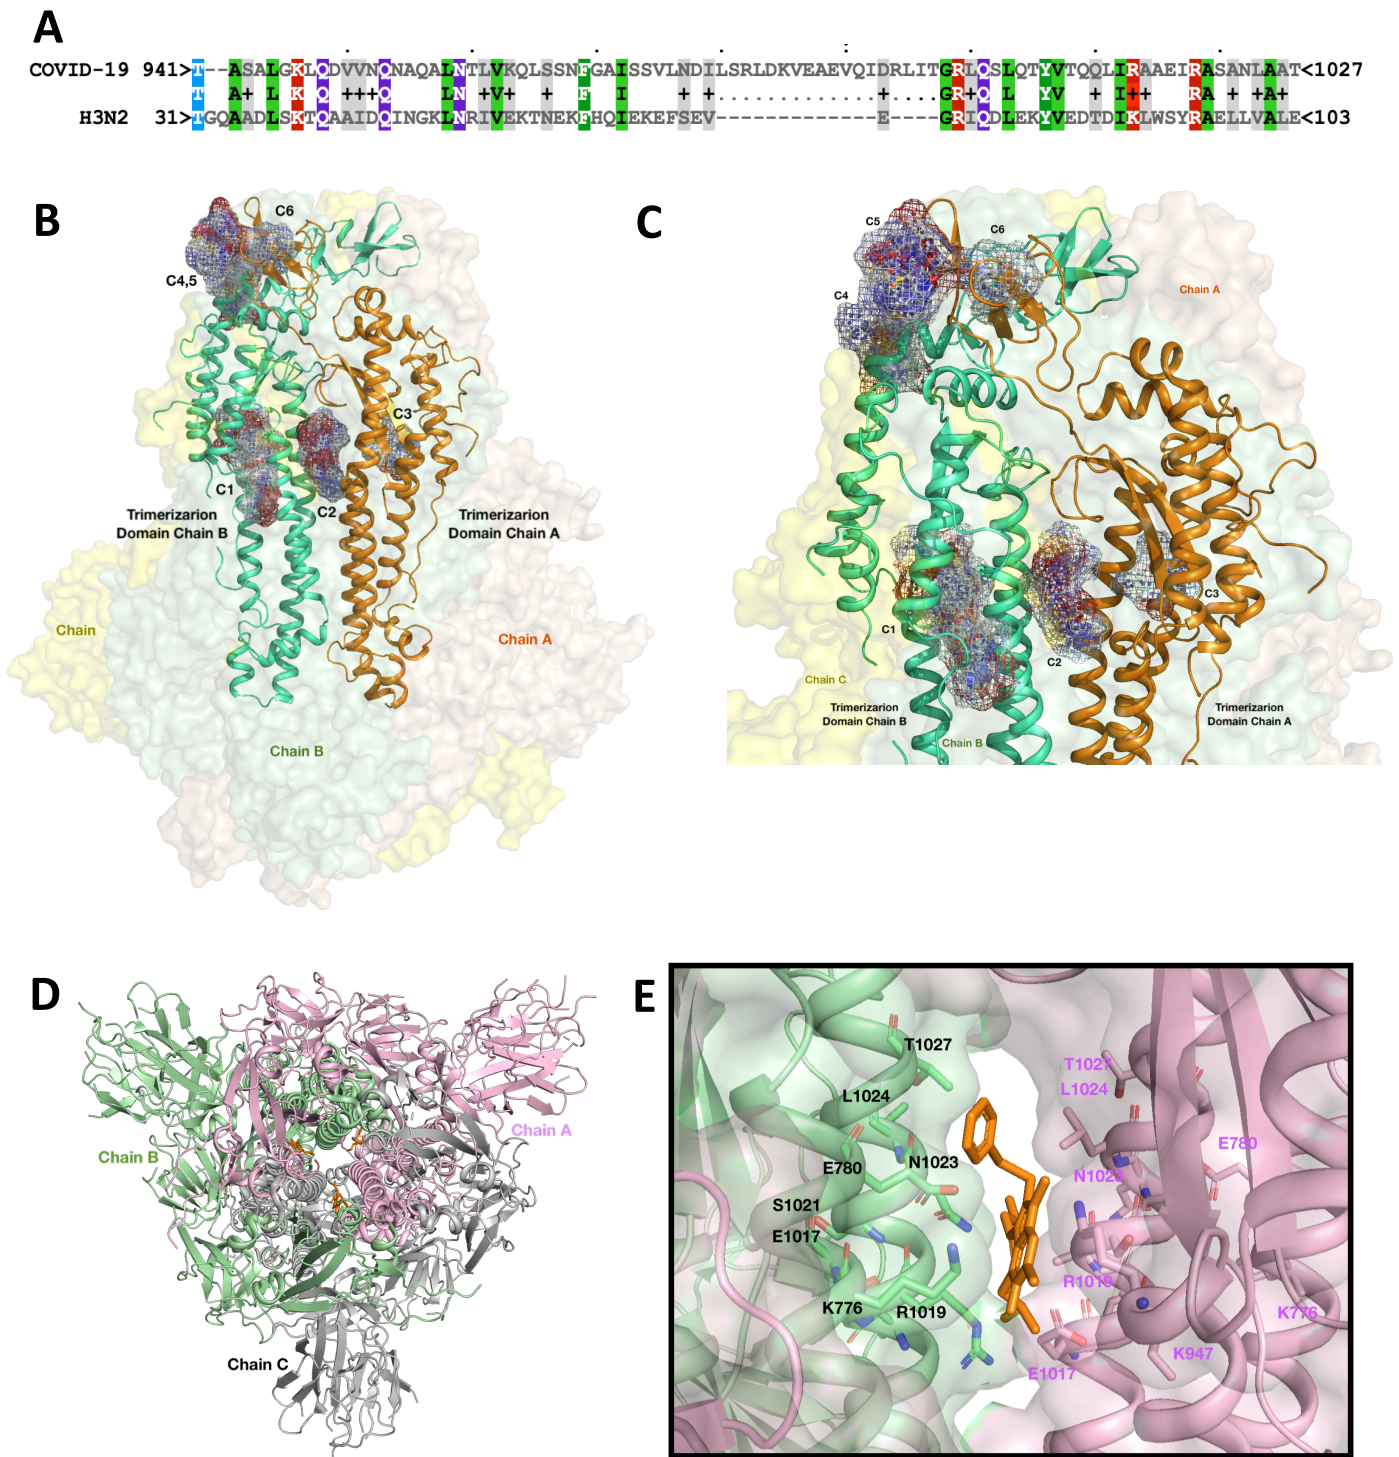

**Figure S1:** (A) Sequence alignment of Arbidol binding region of COVID-19 spike glycoprotein and H3N2 HA protein. Identical residues are coloured and similar residues are shaded in grey and indicated with + sign. (B) Surface and cartoon structure of COVID-19 spike glycoprotein showing potential Arbidol binding sites as predicted. The six unique Arbidol binding predicted clusters are shown as sticks and mesh, and labelled C1 - C6. The trimerization S2 domain region of Chain A and Chain B are shown in the orange and green cartoon, respectively. The structure of spike glycoprotein homotrimer is shown in semi-transparent surface model and individual monomers (Chain A-C) are coloured accordingly. (C) Closer and tilt view of (A), colour coding and labelling are the same as above. (D) Bottom view of 3D structure of Arbidol in complex with COVID-19 spike glycoprotein (Refer. Fig. 1B). (Chain A-C coloured in pink, green and grey respectively) and Arbidol is shown as orange sticks. (E) Transparent surface model showing the Arbidol-binding site and the key side chain residues (labelled accordingly) of spike glycoprotein involved in the interaction with Arbidol (orange sticks).
